# Supplementary material for: Population Density and Host Preference of the Japanese Pine Sawyer (Monochamus alternatus) in the Qinling–Daba Mountains of China
Source: MDPI journal article supplement (doi:10.3390/insects14020181), 2023-02-13
Supplement: s1 [file s1]

# Population Density and Host Preference of the Japanese Pine Sawyer (*Monochamus alternatus*) in the Qinling–Daba Mountains of China

Junke Nan <sup>1,2</sup>, Jingyu Qi <sup>2</sup>, Yuexiang Yang <sup>2</sup>, Mengqin Zhao <sup>2</sup>, Chaoqiong Liang <sup>3</sup>, Hong He <sup>2,\*</sup> and Cong Wei <sup>1,\*</sup>

<sup>1</sup> Key Laboratory of Plant Protection Resources and Pest Management of the Ministry of Education, College of Plant Protection, Northwest A&F University, Yangling 712100, China

<sup>2</sup> Key Laboratory of National Forestry and Grassland Administration for Control of Forest Biological Disasters in Western China, College of Forestry, Northwest A&F University, Yangling 712100, China

<sup>3</sup> Shaanxi Academy of Forestry, Xi'an 710082, China

Supplementary figure:

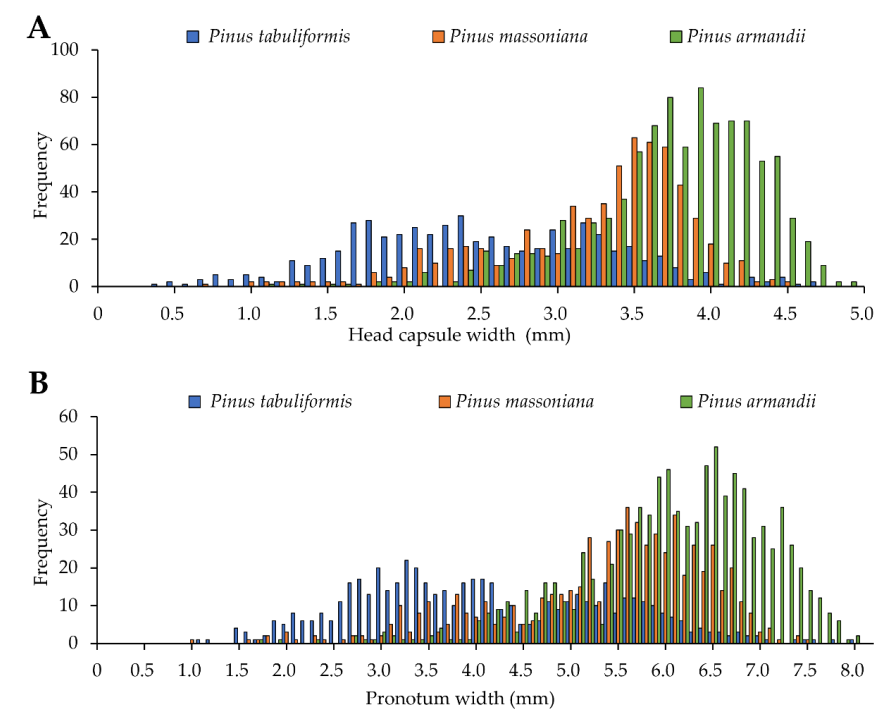

**Figure S1.** Frequency distribution of head capsule width and pronotum width of *Monochamus alternatus* larvae. A: Frequency distribution of head capsule width of *M. alternatus* larvae on *P. tabuliformis*, *P. armandii* and *P. massoniana*; B: Frequency distribution of pronotum width of *M. alternatus* larvae on *P. tabuliformis*, *P. armandii* and *P. massoniana*.

Supplementary table captions:

**Table S1.** Different groups were divided according to the head capsule width of *Monochamus alternatus* larvae.

**Table S2.** Different groups were divided according to the pronotum width of *Monochamus alternatus* larvae.

**Table S3.** Feeding and oviposition preference of *Monochamus alternatus* on three pine trees.
