# Supplementary material for: Population Density and Host Preference of the Japanese Pine Sawyer (Monochamus alternatus) in the Qinling–Daba Mountains of China
Source: Insects. 2023 Feb 13;14(2):181. doi: 10.3390/insects14020181 (PMC9967673; doi:10.3390/insects14020181)
Supplement: Supplementary file 1 [file insects-14-00181-s001.zip]

Archive with 4 entries (4 files):
- Supplementary Information.pdf
- Table S1.xlsx
- Table S2.xlsx
- Table S3.xlsx
