# Supplementary material for: Population Density and Host Preference of the Japanese Pine Sawyer (Monochamus alternatus) in the Qinling–Daba Mountains of China
Source: Insects. 2023 Feb 13;14(2):181. doi: 10.3390/insects14020181 (PMC9967673; doi:10.3390/insects14020181)
Supplement: Supplementary file 1 [file insects-14-00181-s001.zip › Table S1.xlsx]

## Sheet: Table S1
Table S1. Different groups were divided according to the head capsule width of Monochamus alternatus larvae.
Groups	Head capsule width (mm)	Range (mm)	Maximum (mm)	Minimum (mm)	Range (mm)
Group 1	0.51~1.40	0.89	4.91	0.59	4.32
Group 2	1.41~2.30	0.89
Group 3	2.31~3.20	0.89
Group 4	3.21~4.10	0.89
Group 5	4.11~5.00	0.89
