# Supplementary material for: Population Density and Host Preference of the Japanese Pine Sawyer (Monochamus alternatus) in the Qinling–Daba Mountains of China
Source: Insects. 2023 Feb 13;14(2):181. doi: 10.3390/insects14020181 (PMC9967673; doi:10.3390/insects14020181)
Supplement: Supplementary file 1 [file insects-14-00181-s001.zip › Table S2.xlsx]

## Sheet: Table S2
Table S2. Different groups were divided according to the pronotum width of Monochamus alternatus larvae.
Groups	Pronotum width (mm)	Range (mm)	Maximum (mm)	Minimum (mm)	Range (mm)
Group 1	1.11~2.50	1.39	8.04	1.11	6.93
Group 2	2.51~3.90	1.39
Group 3	3.91~5.30	1.39
Group 4	5.31~6.70	1.39
Group 5	6.71~8.10	1.39
