# Supplementary material for: Population Density and Host Preference of the Japanese Pine Sawyer (Monochamus alternatus) in the Qinling–Daba Mountains of China
Source: Insects. 2023 Feb 13;14(2):181. doi: 10.3390/insects14020181 (PMC9967673; doi:10.3390/insects14020181)
Supplement: Supplementary file 1 [file insects-14-00181-s001.zip › Table S3.xlsx]

## Sheet: Table S3
Table S3. Feeding and oviposition preference of Monochamus alternatus on three pine trees.
Tree species	Feeding area on young branch (mm²)	Variance analysis	Feeding area on old branch bark (mm²)	Variance analysis	Feeding area on log bark (mm²)	Variance analysis	Total feeding area (mm²)	Variance analysis	Oviposition scars	Variance analysis
Pinus tabuliformis	22.44% (5700)	F=1.870, P=0.162	69.15% (17565)	F=0.867, P=0.425	8.41% (2135)	F=7.728, P=0.001	36.94% (25400)	F=2.009, P=0.142	33.74% (195)	F=2.344, P=0.105
Pinus armandii	5.39% (765)		80.12% (11365)		14.49% (2055)		20.63% (14185)		42.91% (248)
Pinus massoniana	16.40% (4785)		44.07% (12855)		39.53% (11530)		42.43% (29170)		23.36% (135)
Total	16.36% (11250)		60.77% (41785)		22.86% (15720)		100% (68755)		100% (578)
Notes: The different letters indicate a significant difference (p-value < 0.05).
